# Supplementary material for: Effect of erythropoietin administration on proteins participating in iron homeostasis in Tmprss6-mutated mask mice
Source: PLOS journal article supplement (doi:10.1371/journal.pone.0186844), 2017-10-26
Supplement: S5 (10.1371/journal.pone.0186844.s005) [file journal.pone.0186844.s005]

**S1 Fig. Validation of the anti-ERFE antibody.**

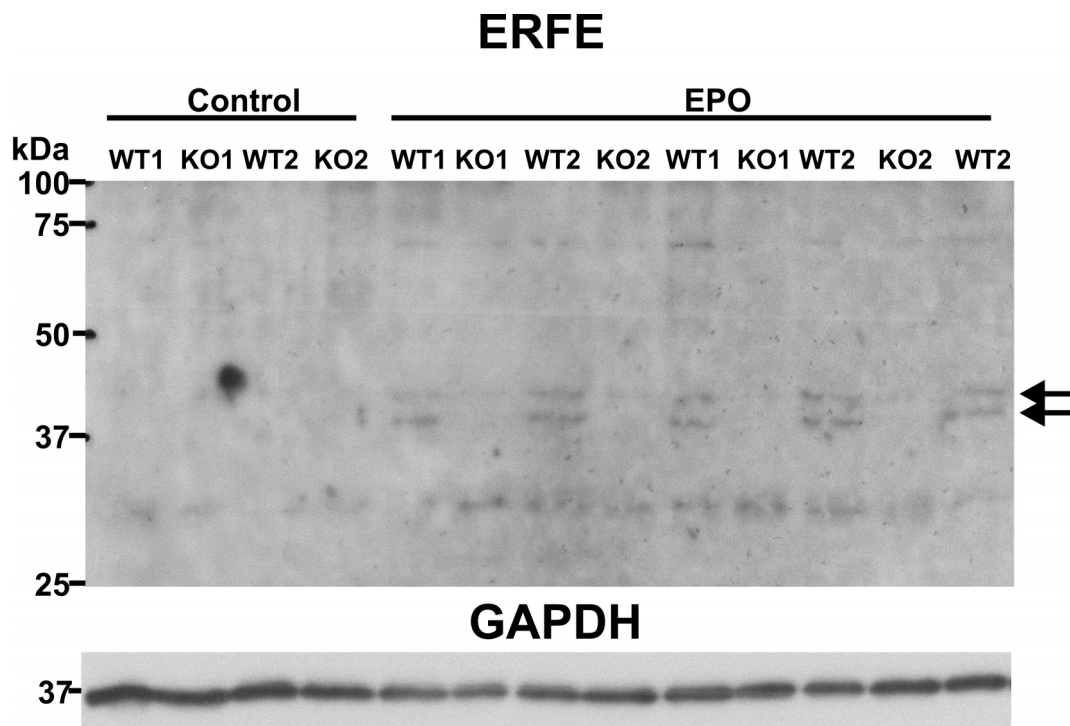

Microsomes were prepared from two sets of mouse spleens from 2 month old male *Fam132b*<sup>+/+</sup> (WT) and *Fam132b*<sup>-/-</sup> (KO) control mice, or from *Fam132b*<sup>+/+</sup> and *Fam132b*<sup>-/-</sup> mice treated with erythropoietin (EPO) 15 hours before sacrifice. Following standard immunoblotting procedure, ERFE was detected by SC-246567 anti-myonectin antibody at 1:200 dilution.

ERFE could not be detected in control mice. EPO treatment for 15 hours enabled ERFE detection (arrows) in *Fam132b*<sup>+/+</sup> mice, but not in *Fam132b*<sup>-/-</sup> mice. It is therefore concluded that the two bands at approximately 42 and 39 kDa (arrows) represent ERFE protein.
